# Supplementary material for: Genotype tunes pancreatic ductal adenocarcinoma tissue tension to induce matricellular fibrosis and tumor progression
Source: Springer Nature journal article supplement (doi:10.1038/nm.4082), 2016-04-18
Supplement: 41591_2016_BFnm4082_MOESM32_ESM.pdf [file 41591_2016_BFnm4082_MOESM32_ESM.pdf]

## CORRECTION NOTICE

*Nat. Med.* 22, 497–505 (2016)

### Genotype tunes pancreatic ductal adenocarcinoma tissue tension to induce matricellular fibrosis and tumor progression

Hanane Laklai, Yekaterina A Miroshnikova, Michael W Pickup, Eric A Collisson, Grace E Kim, Alex S Barrett, Ryan C Hill, Johnathon N Lakins, David D Schlaepfer, Janna K Mouw, Valerie S LeBleu, Nilotpal Roy, Sergey V Novitskiy, Julia S Johansen, Valeria Poli, Raghu Kalluri, Christine A Iacobuzio-Donahue, Laura D Wood, Matthias Hebrok, Kirk Hansen, Harold L Moses & Valerie M Weaver

In the version of this supplementary file originally posted online, the supplementary information file was incomplete and lacked some data in Supplementary Figure 11. The error has been corrected in this file as of 5 August 2016.

---

# Supplementary Fig 1.

**a**

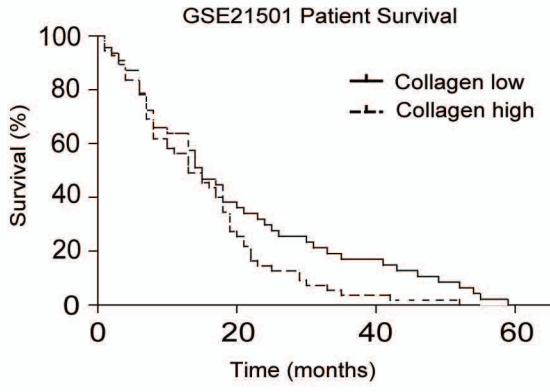

**b**

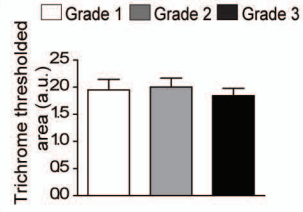

**c**

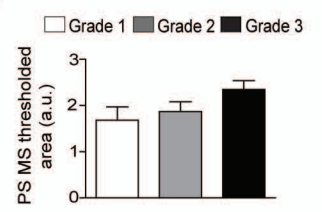

**d**

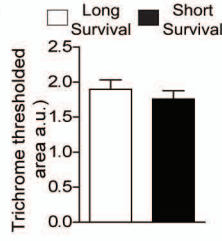

**e**

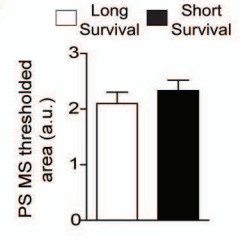

**f**

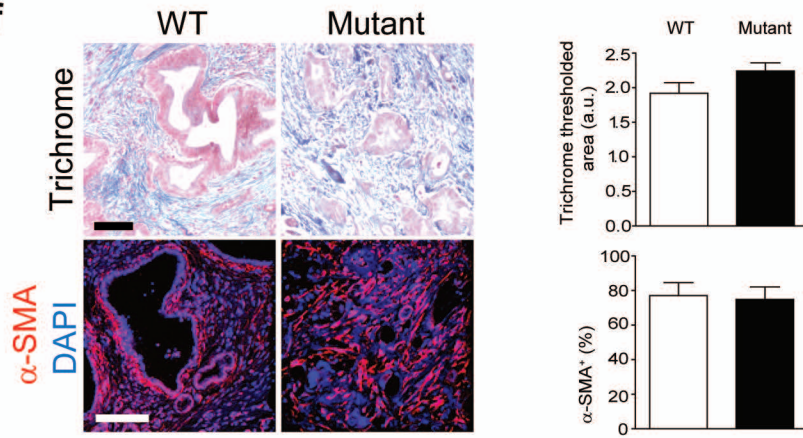

# Supplementary Fig 2.

**a**

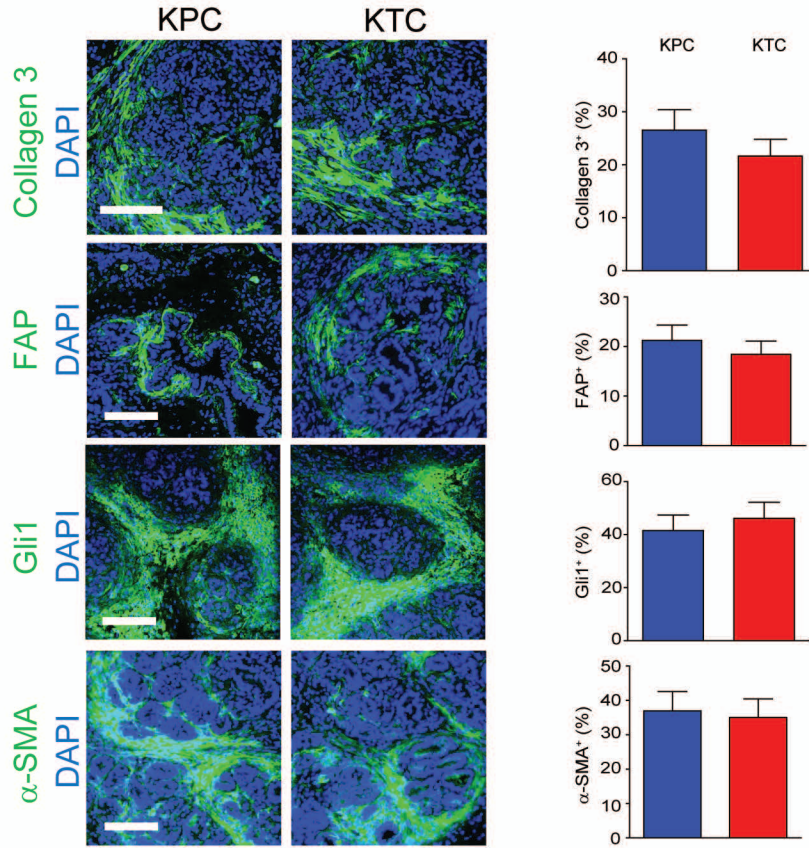

# Supplementary Fig 3.

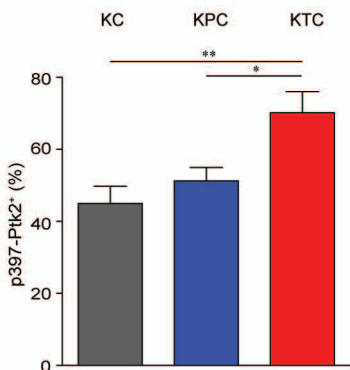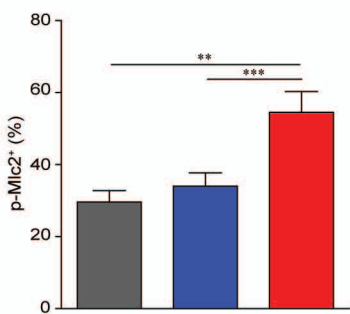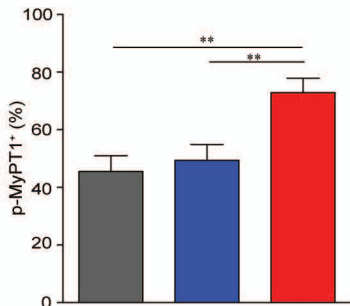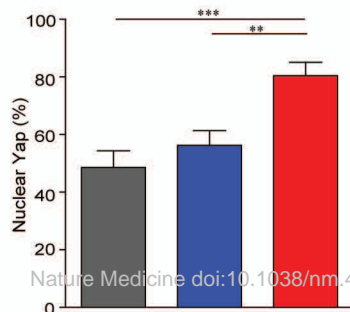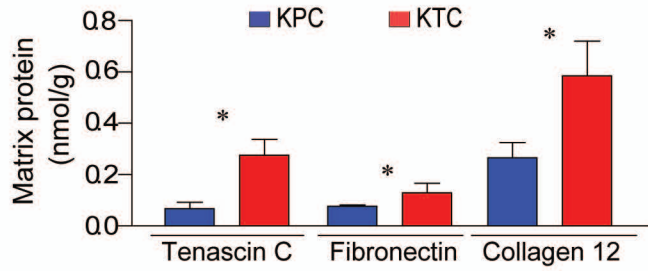

**C**

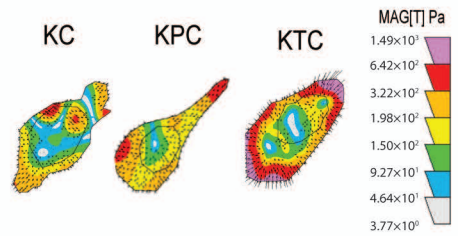

# Supplementary Fig 4.

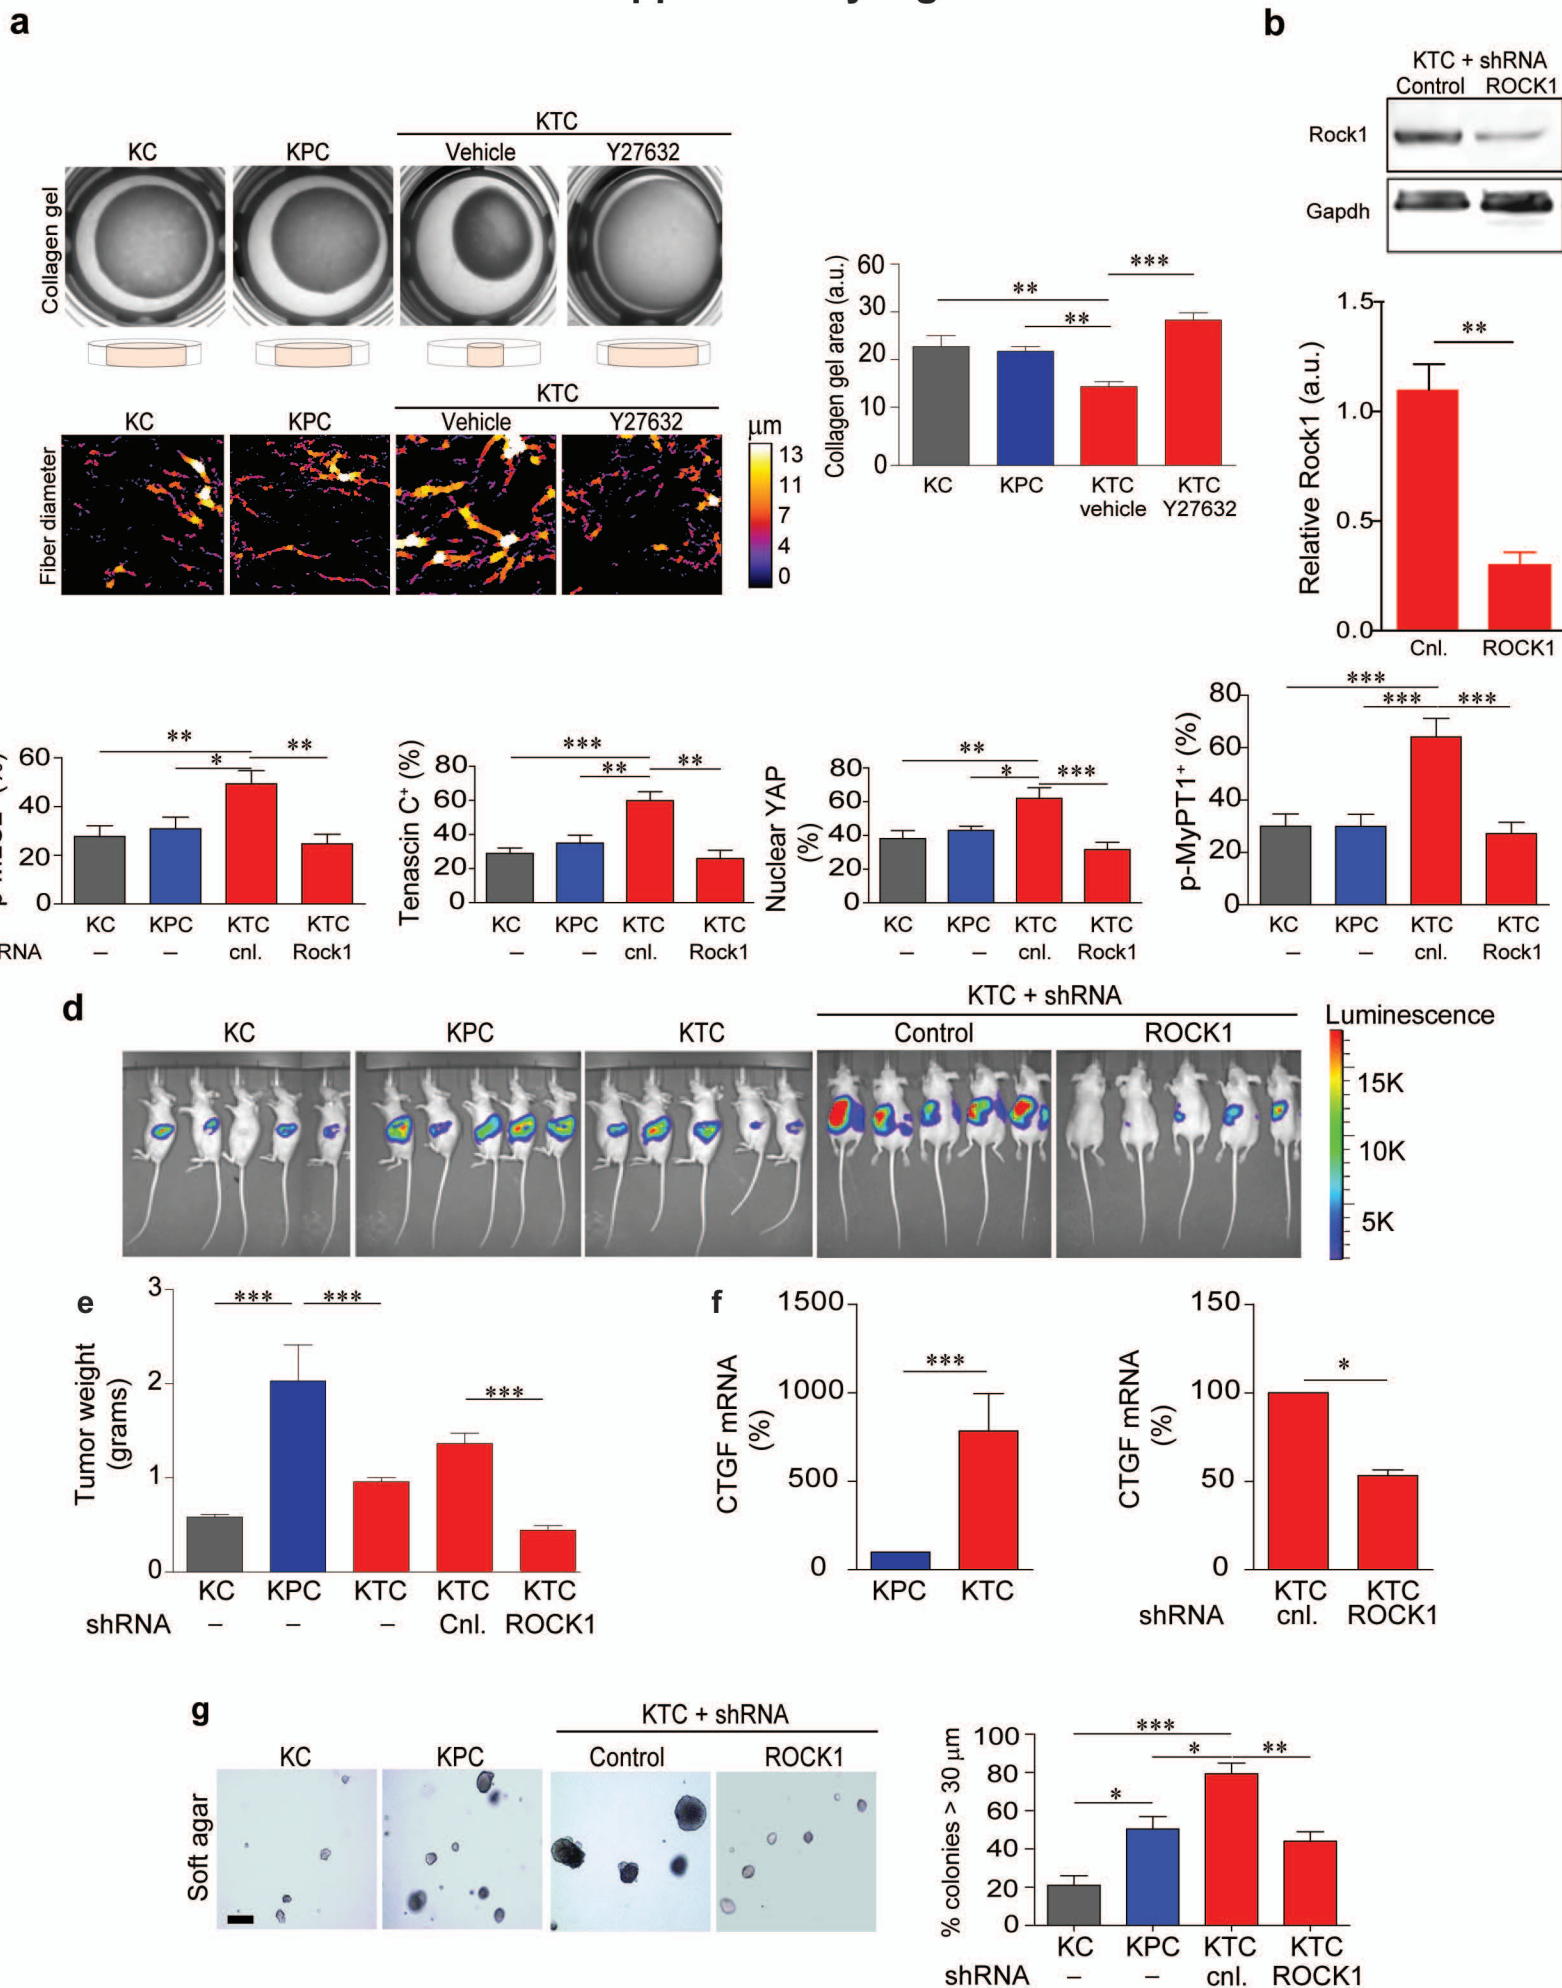



# Supplementary Fig 5.

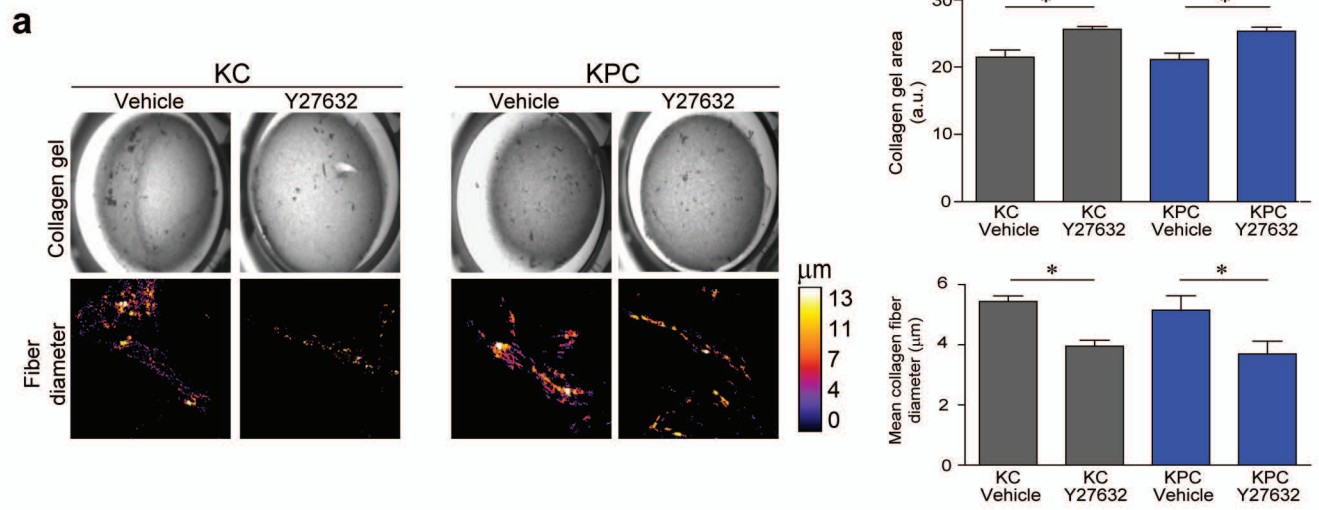

**b**

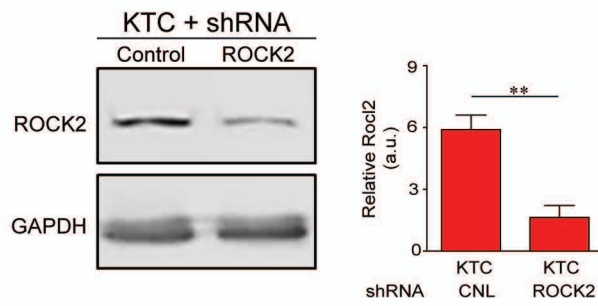

**c**

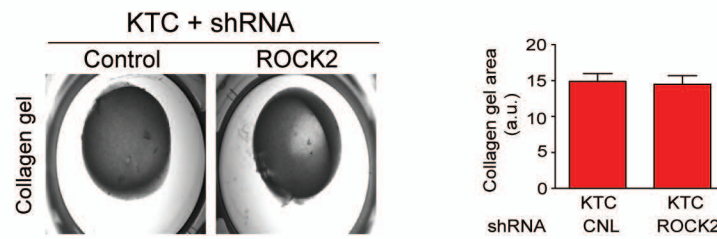

**d**

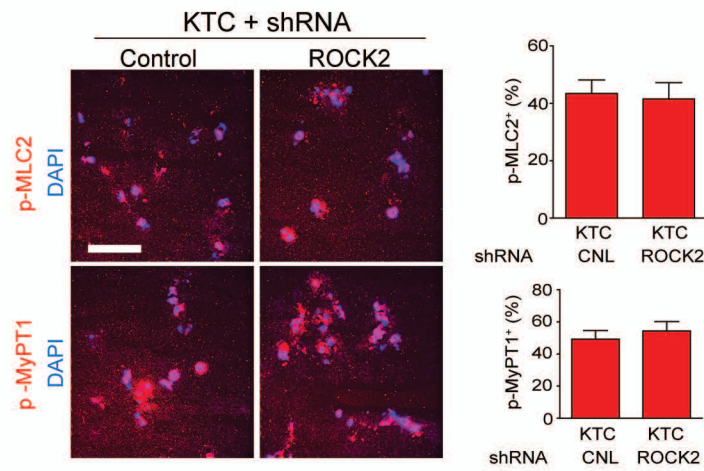

# Supplementary Fig 6.

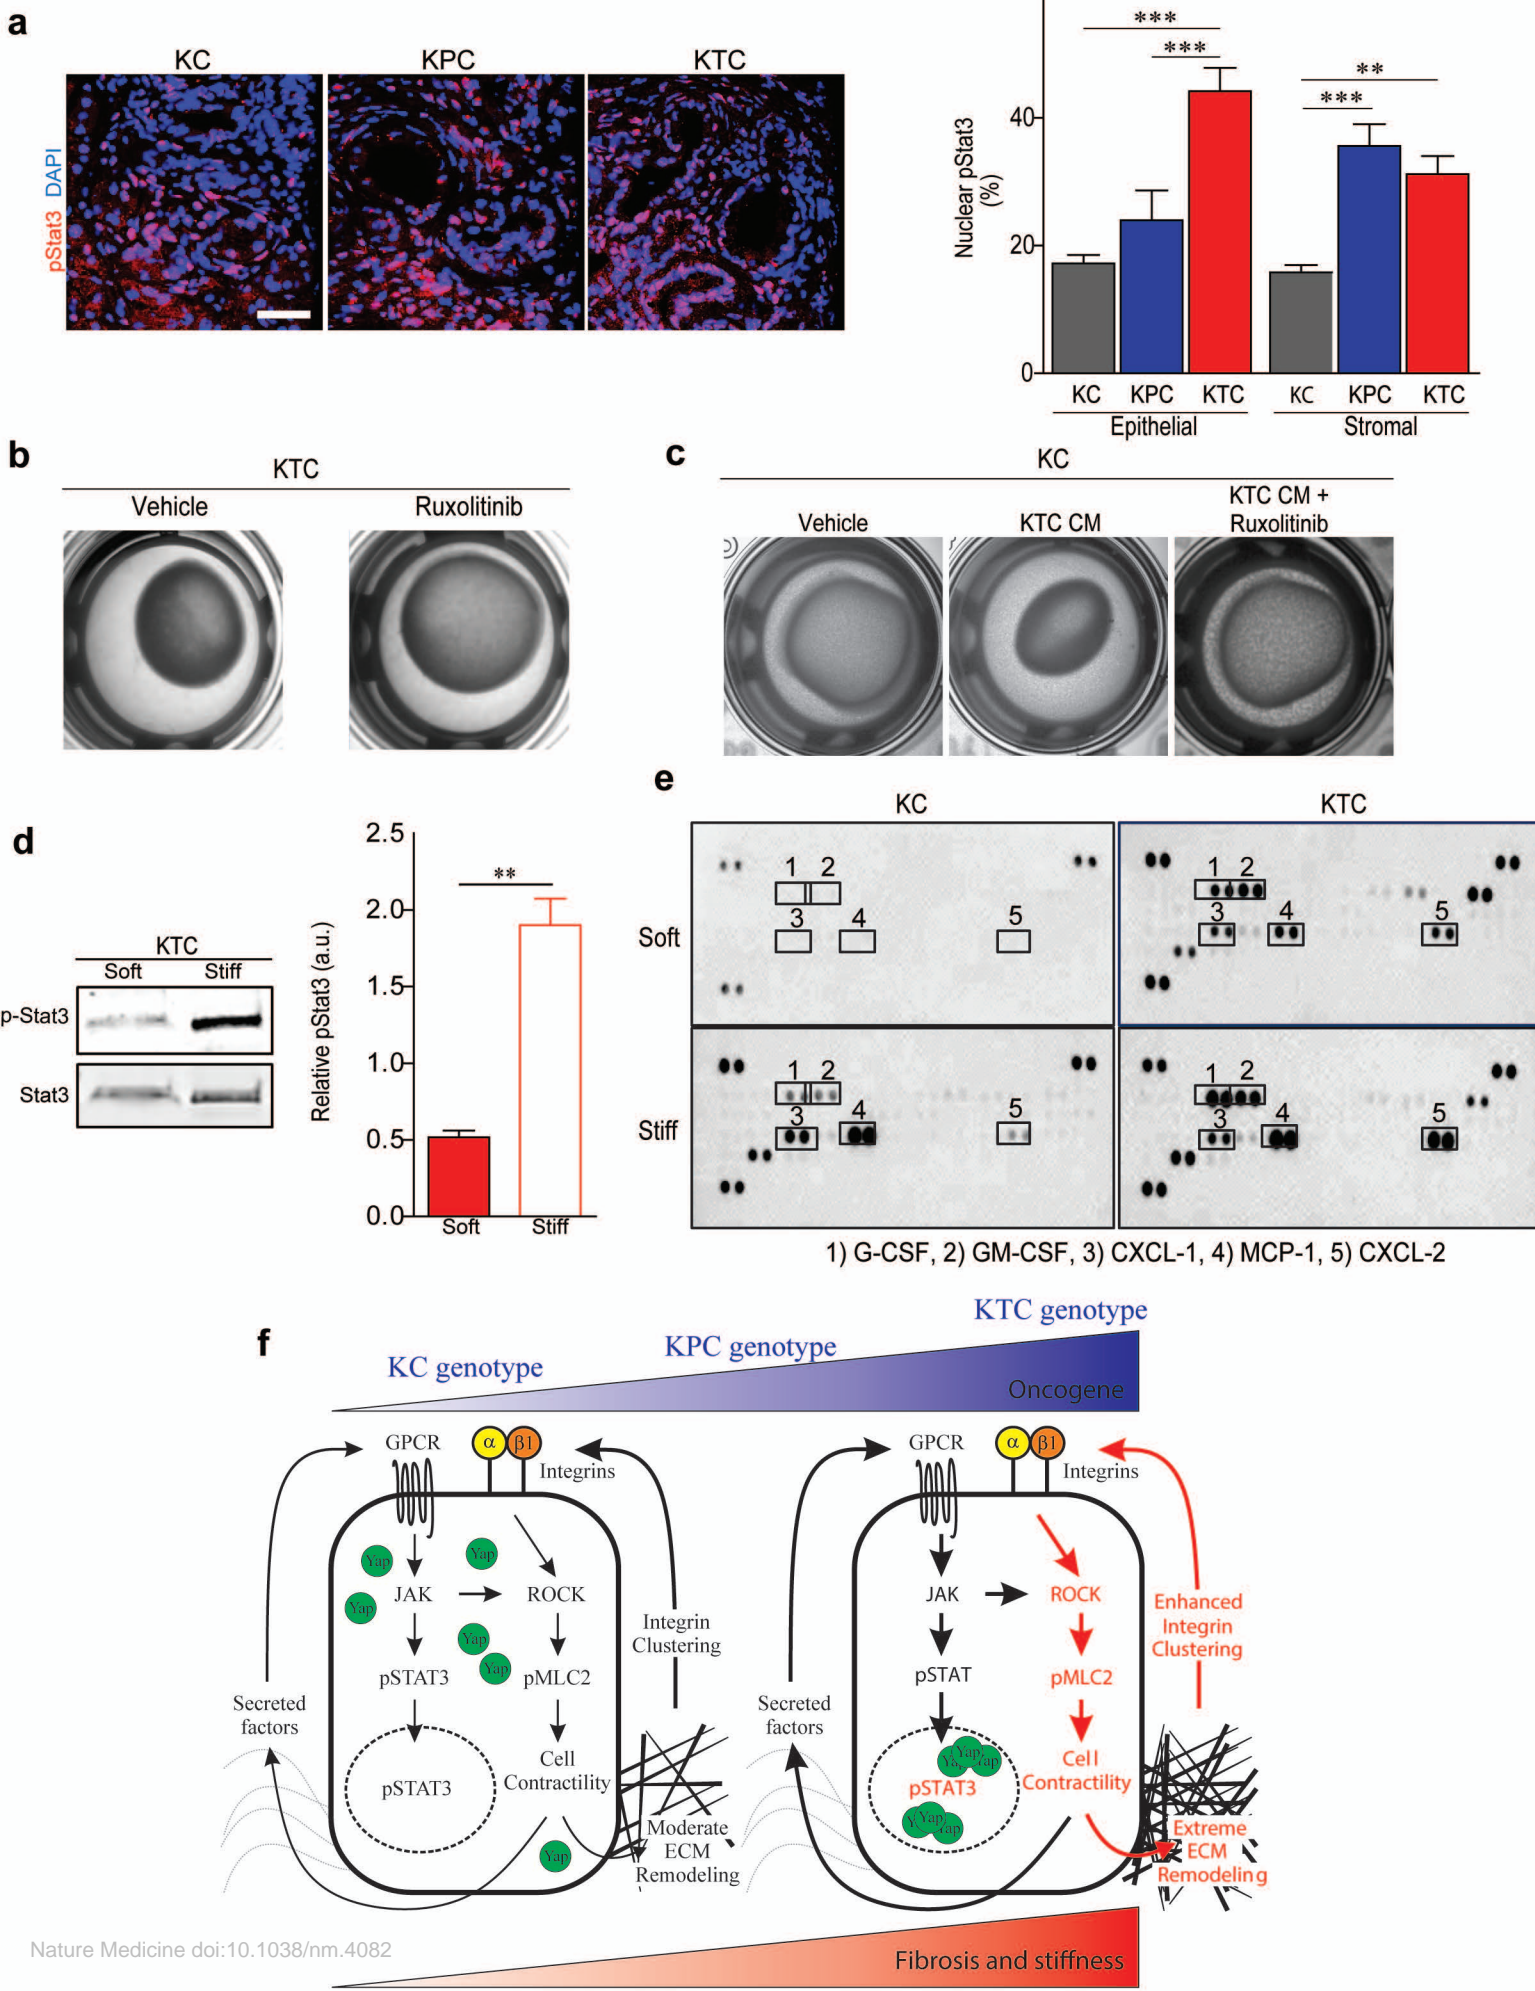



# Supplementary Fig 7.

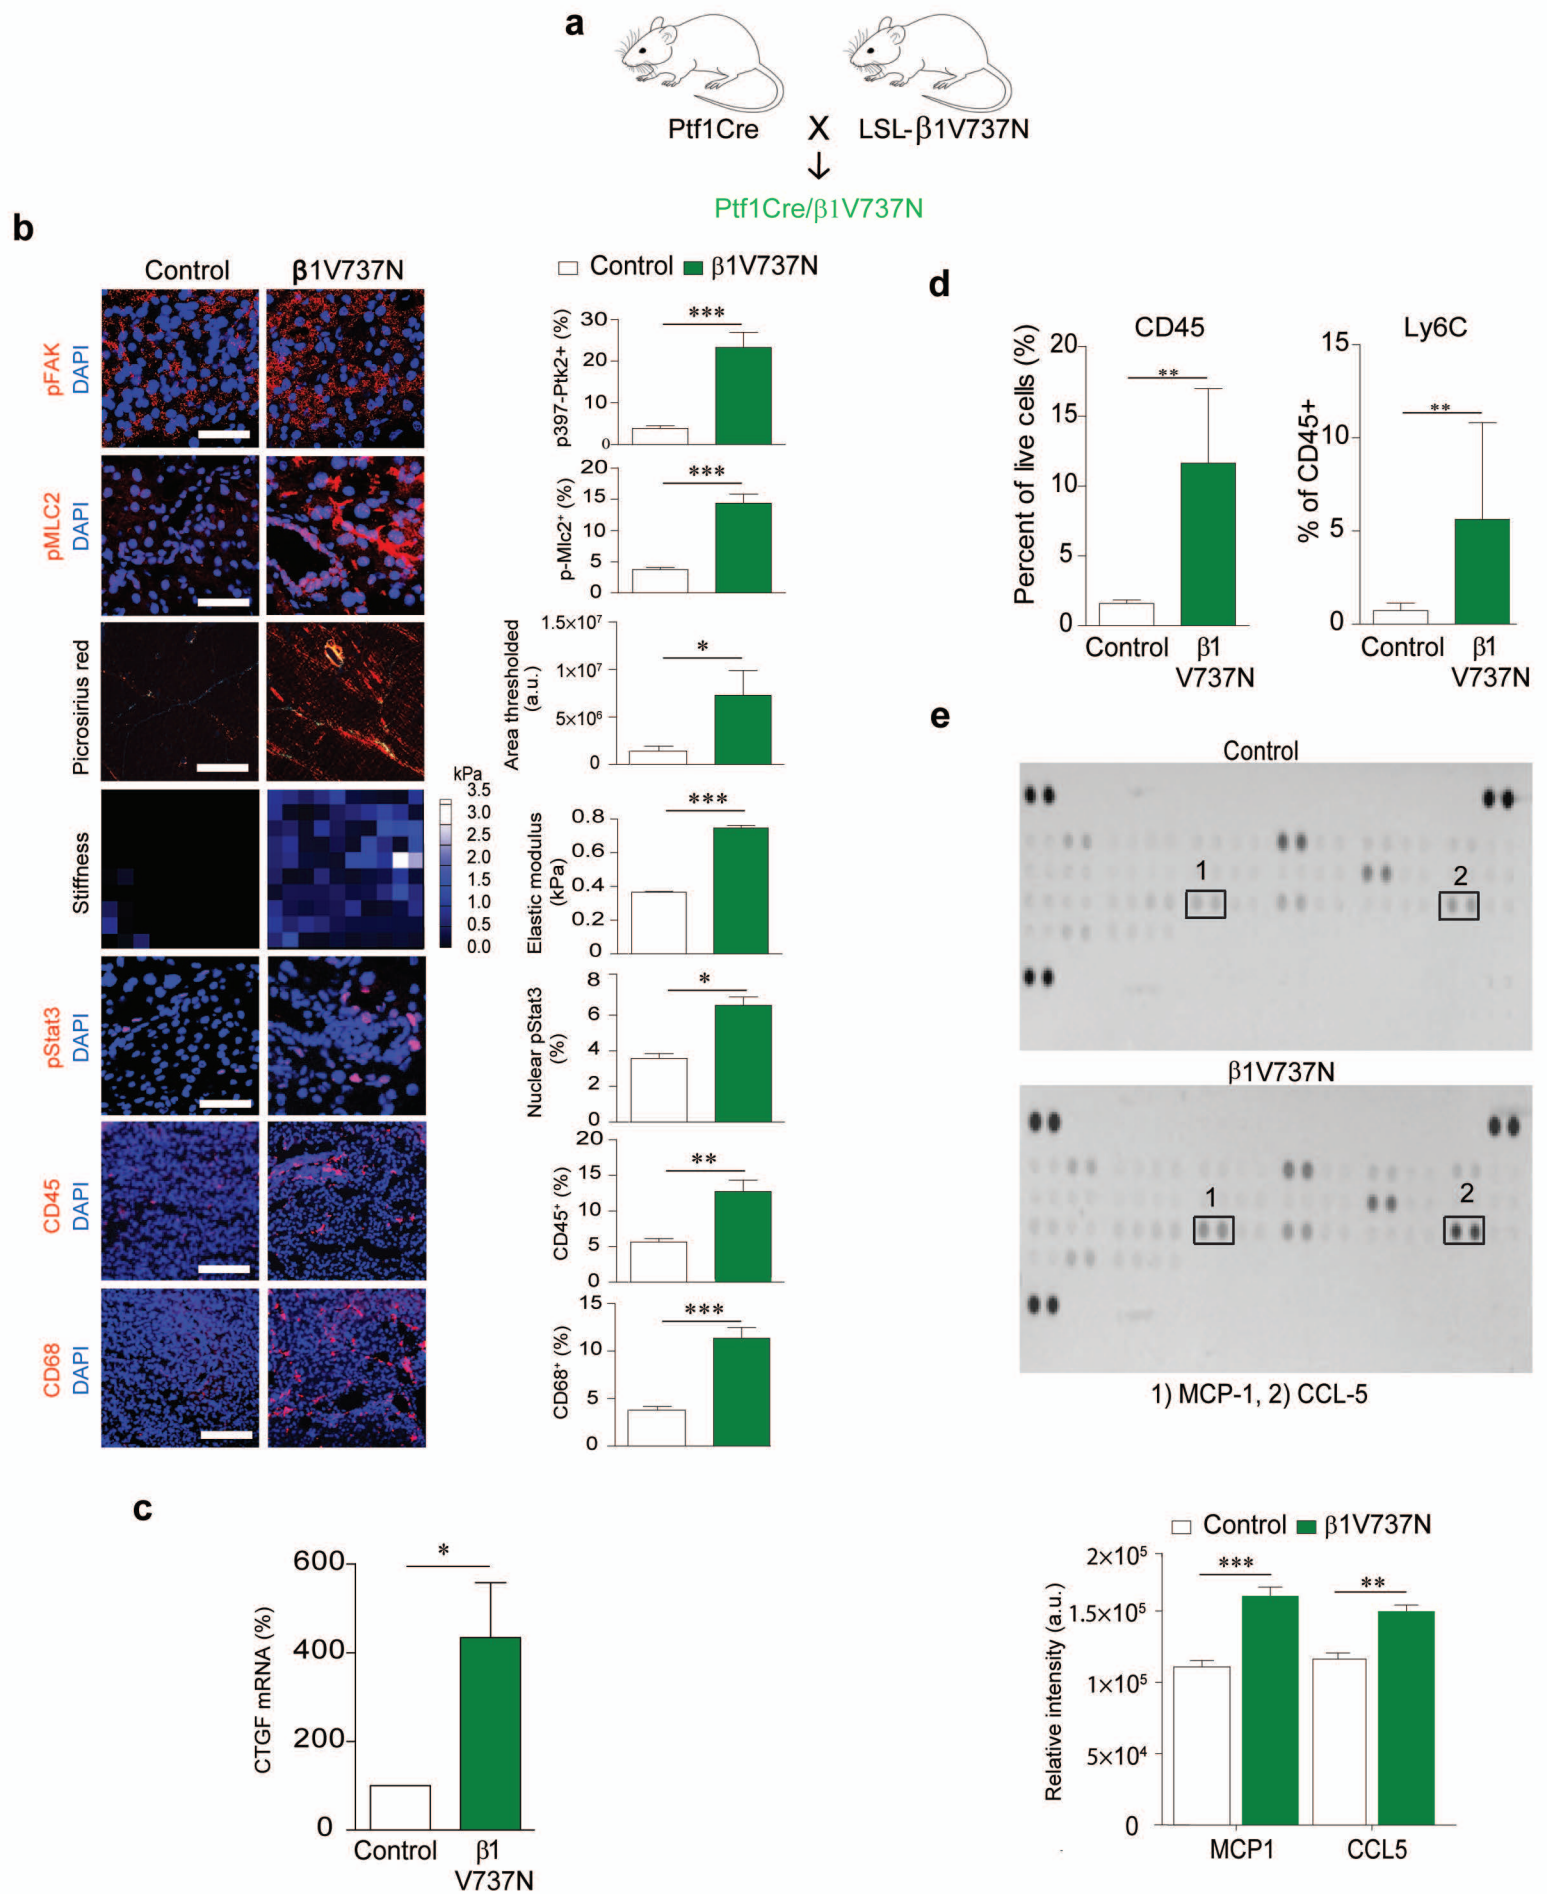



# Supplementary Fig 8.

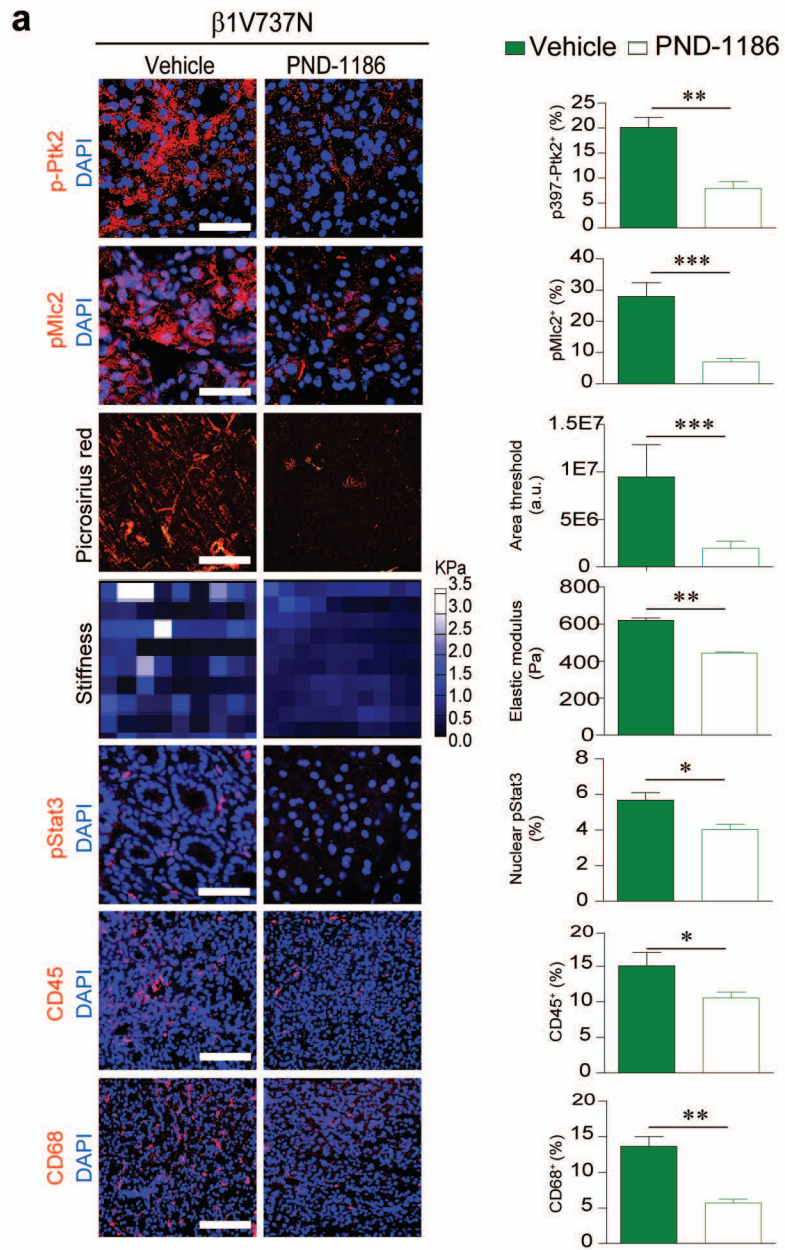

# Supplementary Fig 9.

**a**

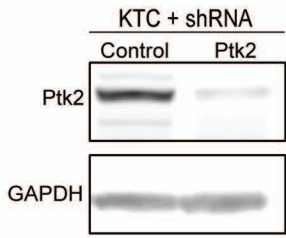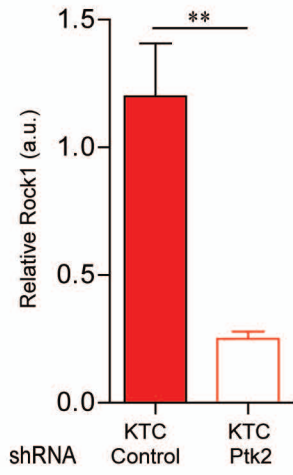

**b**

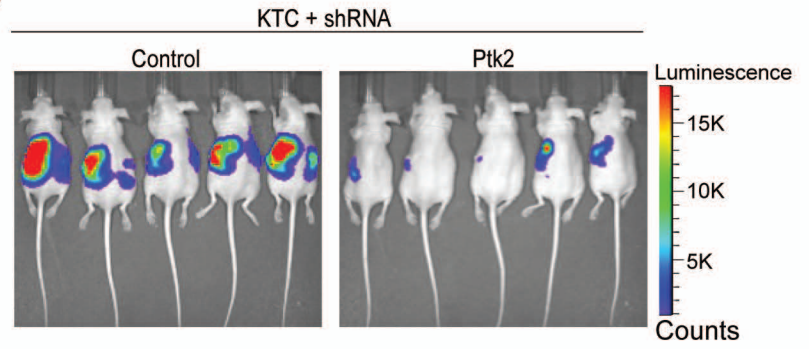

**c**

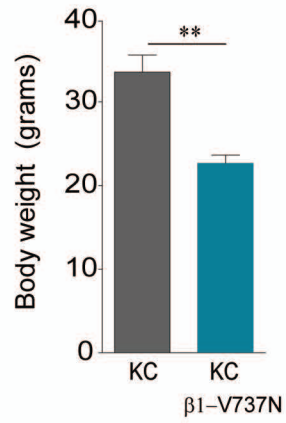

**d**

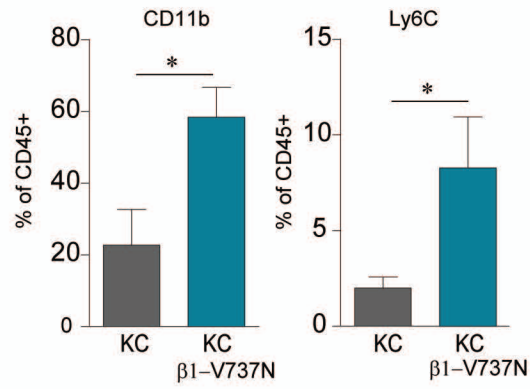

**e**

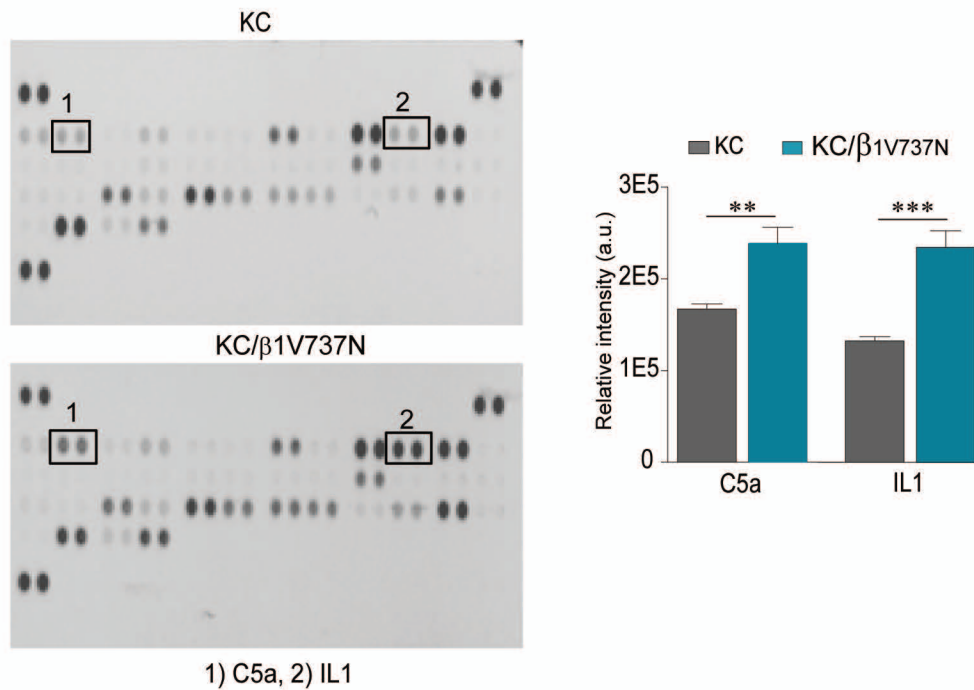

# Supplementary Fig 10.

**a**

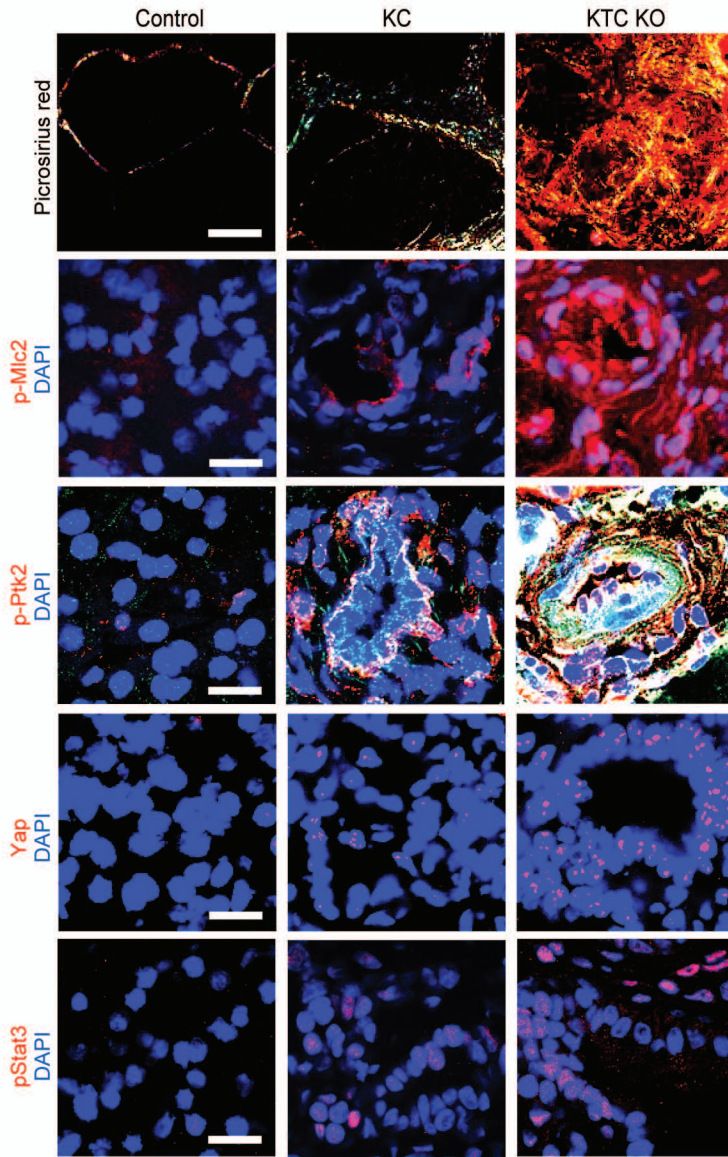

**b**

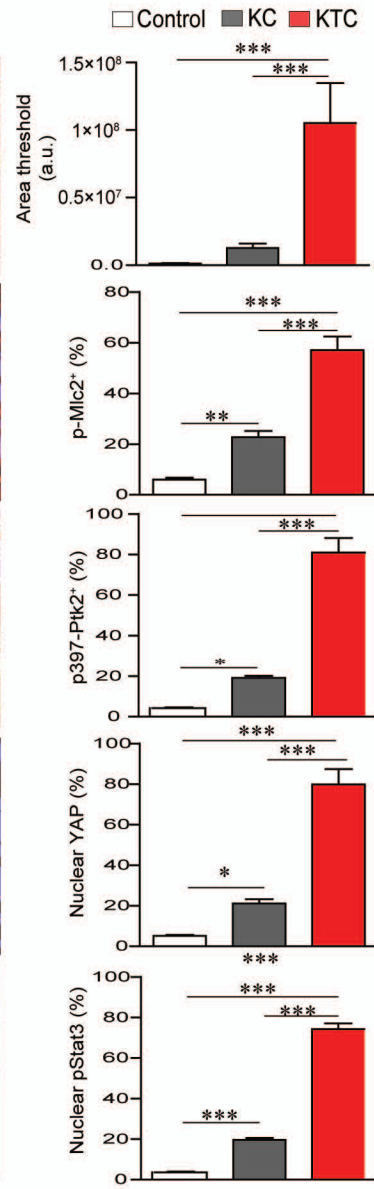

**c**

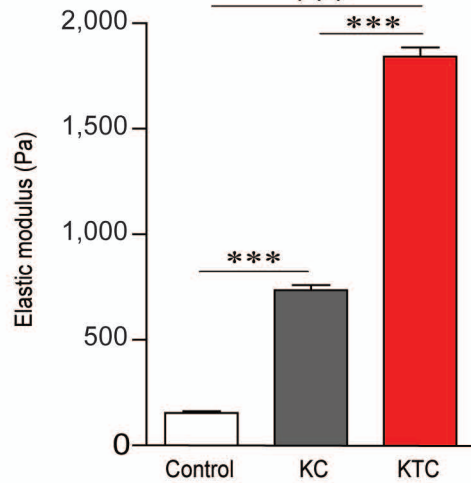



# Supplementary Fig 11.

**a**

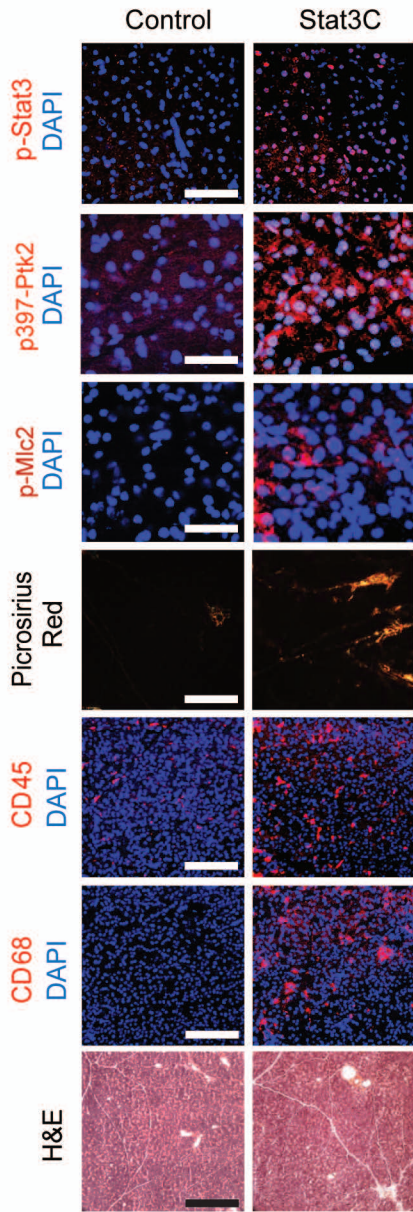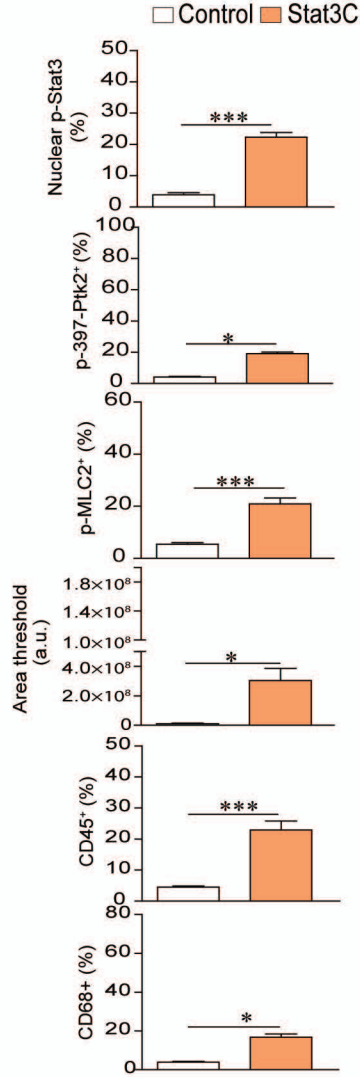

**c**

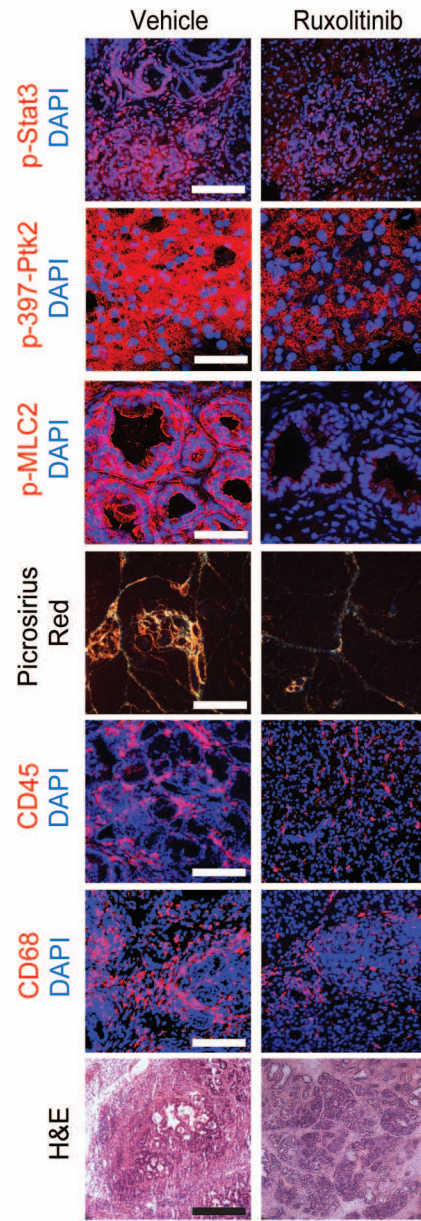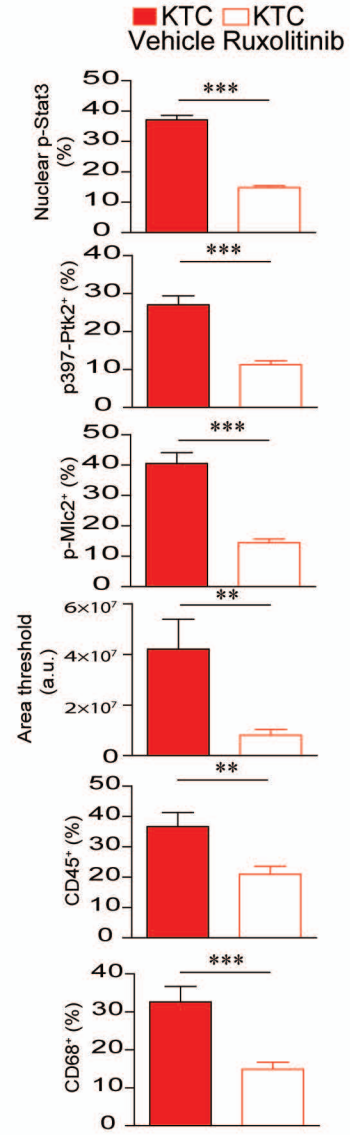

**b**

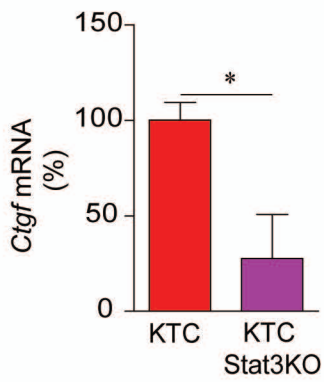

**d**

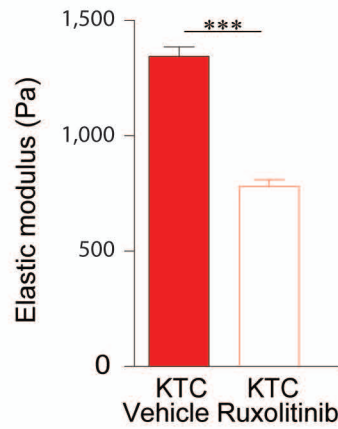

**e**

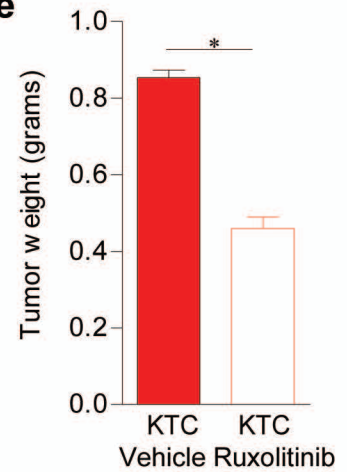



# Supplementary Fig 12.

**a**

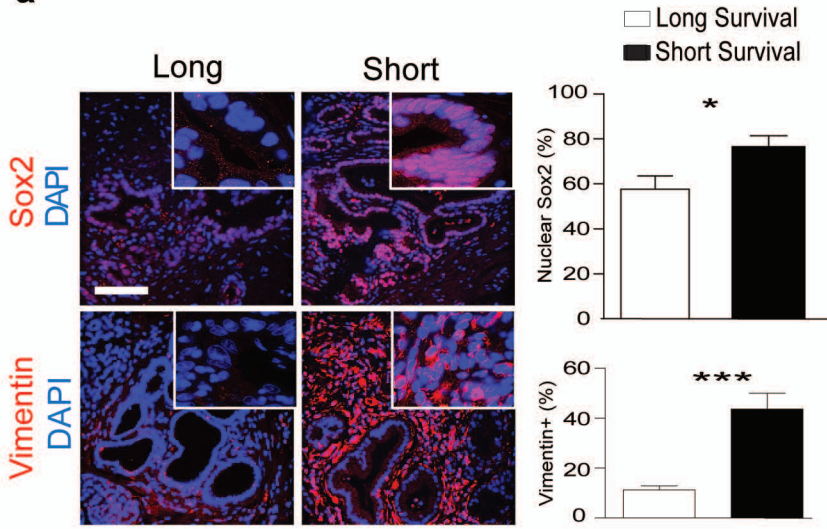

**b**

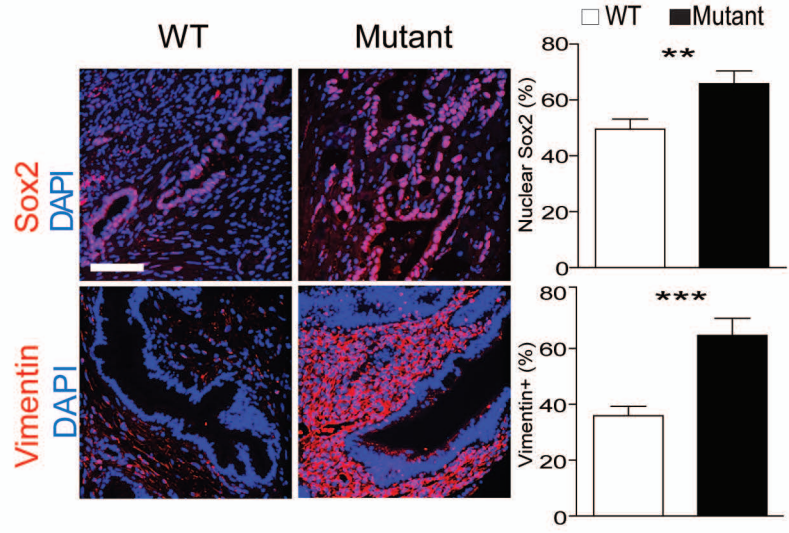

### Supplementary Table 1

| Individual Genes Used for Survival Analysis of GSE21501 |
|---------------------------------------------------------|
| COL1A2                                                  |
| COL2A1                                                  |
| COL3A1                                                  |
| COL4A1                                                  |
| COL5A1                                                  |
| COL11A1                                                 |
| COL24A1                                                 |
| COL27A1                                                 |

Supplementary Table 2

| Protein                                                                | Functional         | Matrisome      | MW     | GENE      | KPC/KC | p val | KTC/KC | p val | KTC/KPC | p val | Analytical CV(%) |
|------------------------------------------------------------------------|--------------------|----------------|--------|-----------|--------|-------|--------|-------|---------|-------|------------------|
| Agrin(iso 2,3,4,5,&6)                                                  | Basement Membrane  | Glycoprotein   | 208646 | AGRN*     | 0.910  | 0.536 | 1.426  | 0.494 | 1.566   | 0.413 | 13%              |
| Collagen alpha-1/5(IV) chain(Arresten/Core Protein)                    | Basement Membrane  | Collagen       | 160613 | COL4A1*   | 1.071  | 0.611 | 0.952  | 0.674 | 0.889   | 0.415 | 16%              |
| Collagen alpha-1/5(IV) chain(Arresten/Core Protein)                    | Basement Membrane  | Collagen       | 160613 | COL4A1/5* | 1.151  | 0.345 | 1.087  | 0.574 | 0.944   | 0.508 | 22%              |
| Collagen alpha-2(IV) chain                                             | Basement Membrane  | Collagen       | 161386 | COL4A2    | 1.047  | 0.735 | 1.065  | 0.669 | 1.017   | 0.844 | 14%              |
| Collagen alpha-2(IV) chain(Canstatin/Core Protein)                     | Basement Membrane  | Collagen       | 161386 | COL4A2*   | 0.968  | 0.845 | 1.027  | 0.819 | 1.060   | 0.727 | 12%              |
| Perlecan                                                               | Basement Membrane  | Proteoglycan   | 375271 | HSPG2     | 0.889  | 0.646 | 1.189  | 0.379 | 1.338   | 0.264 | 19%              |
| Perlecan(Endorepellin)                                                 | Basement Membrane  | Proteoglycan   | 375271 | HSPG2*    | 0.908  | 0.712 | 0.958  | 0.827 | 1.055   | 0.860 | 7%               |
| Laminin alpha-2                                                        | Basement Membrane  | Glycoprotein   | 339982 | LAMA2     | 1.108  | ND    | KC     | ND    | PC      | ND    | 23%              |
| Laminin alpha-5                                                        | Basement Membrane  | Glycoprotein   | 404444 | LAMA5     | 0.944  | 0.832 | 0.650  | 0.136 | 0.689   | 0.212 | 21%              |
| Laminin Beta-1                                                         | Basement Membrane  | Glycoprotein   | 197090 | LAMB1     | 1.402  | 0.110 | 1.493  | 0.153 | 1.065   | 0.788 | 25%              |
| Laminin Beta-2                                                         | Basement Membrane  | Glycoprotein   | 196474 | LAMB2     | 0.851  | 0.569 | 0.511  | 0.053 | 0.601   | 0.119 | 27%              |
| Laminin Beta-3                                                         | Basement Membrane  | Glycoprotein   | 128900 | LAMB3     | 1.126  | 0.607 | 2.012  | 0.002 | 1.787   | 0.008 | 15%              |
| Laminin Gamma-1                                                        | Basement Membrane  | Glycoprotein   | 177387 | LAMC1     | 0.881  | 0.389 | 1.054  | 0.775 | 1.197   | 0.351 | ND               |
| Laminin Gamma-2                                                        | Basement Membrane  | Glycoprotein   | 130846 | LAMC2     | 1.307  | 0.352 | 1.332  | 0.461 | 1.019   | 0.961 | 35%              |
| Nidogen-1                                                              | Basement Membrane  | Glycoprotein   | 137039 | NID1      | 0.987  | 0.938 | 1.076  | 0.661 | 1.090   | 0.563 | 18%              |
| Nidogen 1/2 (osteonidogen)(Nid1/2)                                     | Basement Membrane  | Glycoprotein   | 136538 | NID1/2*   | 0.950  | 0.783 | 0.969  | 0.830 | 1.020   | 0.919 | 21%              |
| Actin (All isoforms)                                                   | Cytoskeletal       | Cellular       | 42051  | ACT       | 0.907  | 0.280 | 1.091  | 0.269 | 1.203   | 0.009 | 10%              |
| Actin, cytoplasmic 1/2                                                 | Cytoskeletal       | Cellular       | 41737  | ACTB      | 1.139  | 0.300 | 1.271  | 0.128 | 1.116   | 0.497 | 10%              |
| Desmin                                                                 | Cytoskeletal       | Cellular       | 53457  | DES       | 0.515  | 0.373 | 0.257  | 0.163 | 0.999   | 0.338 | 12%              |
| Spectrin alpha chain, non-erythrocytic 1                               | Cytoskeletal       | Cellular       | 284637 | SPTA2     | 1.143  | 0.400 | 0.984  | 0.928 | 0.861   | 0.280 | 20%              |
| Tubulin beta-4B chain(4b & 5 chain)                                    | Cytoskeletal       | Cellular       | 49586  | TUBB*     | 1.077  | 0.477 | 1.192  | 0.135 | 1.106   | 0.375 | 14%              |
| Vimentin                                                               | Cytoskeletal       | Cellular       | 53733  | VIM       | 1.274  | 0.516 | 1.172  | 0.317 | 0.920   | 0.811 | 19%              |
| Lysyl oxidase-like 1                                                   | ECM regulator      | ECM regulator  | 66589  | LOXL1     | 1.164  | 0.401 | 1.236  | 0.355 | 1.062   | 0.687 | 33%              |
| Transglutaminase 2                                                     | ECM regulator      | ECM regulator  | 77061  | TGM2      | 1.017  | 0.829 | 0.669  | 0.103 | 0.657   | 0.001 | 11%              |
| Collagen alpha-1(XII) chain                                            | FACIT Collagen     | Collagen       | 340214 | COL12A1   | 0.782  | 0.421 | 1.724  | 0.171 | 2.203   | 0.097 | 13%              |
| Collagen alpha-1(XIV) chain                                            | FACIT Collagen     | Collagen       | 191772 | COL14A1   | 1.168  | 0.428 | 0.678  | 0.108 | 0.581   | 0.029 | 14%              |
| Collagen alpha-1(I) chain                                              | Fibrillar Collagen | Collagen       | 137953 | COL1A1    | 0.911  | 0.250 | 0.916  | 0.529 | 1.005   | 0.969 | 10%              |
| Collagen alpha-1(I) chain(C-term Propeptides (NC1 Domain))             | Fibrillar Collagen | Collagen       | 137953 | COL1A1*   | 1.002  | 0.979 | 1.365  | 0.133 | 1.363   | 0.128 | 12%              |
| Collagen alpha-1(I) chain(fragment)                                    | Fibrillar Collagen | Collagen       | 137953 | COL1A1*   | 0.808  | 0.402 | 0.848  | 0.382 | 1.049   | 0.809 | 20%              |
| Collagen alpha-2(I) chain                                              | Fibrillar Collagen | Collagen       | 129564 | COL1A2    | 0.931  | 0.393 | 1.036  | 0.801 | 1.112   | 0.465 | 14%              |
| Collagen alpha-1(V) chain                                              | Fibrillar Collagen | Collagen       | 183987 | COL5A1    | 1.153  | 0.273 | 0.741  | 0.087 | 0.643   | 0.002 | 25%              |
| Collagen alpha-2(V) chain                                              | Fibrillar Collagen | Collagen       | 145018 | COL5A2    | 0.997  | 0.987 | 0.759  | 0.295 | 0.762   | 0.125 | 11%              |
| Collagen alpha-1(XVIII) chain                                          | Matricellular      | Collagen       | 143568 | COL17A1   | 1.009  | 0.968 | 1.594  | 0.173 | 1.580   | 0.114 | 26%              |
| Collagen alpha-1(XVIII) chain                                          | Matricellular      | Collagen       | 182881 | COL18A1   | 1.084  | 0.809 | 0.703  | 0.255 | 0.649   | 0.321 | 12%              |
| Collagen alpha-1(VI) chain                                             | Matricellular      | Collagen       | 108806 | COL6A1    | 0.980  | 0.938 | 0.574  | 0.081 | 0.586   | 0.117 | 15%              |
| Collagen alpha-2(VI) chain                                             | Matricellular      | Collagen       | 108579 | COL6A2    | 1.124  | 0.451 | 0.624  | 0.037 | 0.555   | 0.043 | 14%              |
| Collagen alpha-3(VI) chain                                             | Matricellular      | Collagen       | 288133 | COL6A3    | 0.730  | 0.314 | 0.391  | 0.002 | 0.535   | 0.244 | 16%              |
| Collagen alpha-1(VII) chain(Fibronectin type-III 3 Domain)             | Matricellular      | Collagen       | 295092 | COL7A1*   | 0.955  | 0.866 | 1.887  | 0.307 | 1.975   | 0.291 | 14%              |
| Collagen alpha-1(VII) chain(Fibronectin type-III 1 Domain)             | Matricellular      | Collagen       | 295092 | COL7A1*   | 1.001  | 0.972 | 1.882  | 0.318 | 1.879   | 0.176 | 25%              |
| Dermatopontin                                                          | Matricellular      | Glycoprotein   | 24203  | DPT       | 1.281  | 0.176 | 0.757  | 0.101 | 0.591   | 0.025 | 11%              |
| Fibulin 3                                                              | Matricellular      | Glycoprotein   | 54596  | EFEMP1    | 1.991  | 0.048 | 1.941  | 0.124 | 0.975   | 0.936 | ND               |
| Fibulin 4                                                              | Matricellular      | Glycoprotein   | 44850  | EFEMP2    | 0.754  | 0.366 | 1.423  | 0.031 | 1.887   | 0.063 | 14%              |
| Emilin 1                                                               | Matricellular      | Glycoprotein   | 106667 | EMILIN1   | 1.042  | 0.658 | 0.889  | 0.265 | 0.853   | 0.156 | 17%              |
| Fibulin 1                                                              | Matricellular      | Glycoprotein   | 75381  | FBLN1     | 1.349  | 0.183 | 2.678  | 0.052 | 1.985   | 0.093 | 34%              |
| Fibronectin 1                                                          | Matricellular      | Glycoprotein   | 272511 | FN1       | 1.246  | 0.438 | 2.089  | 0.179 | 1.676   | 0.244 | ND               |
| Fibronectin 1(type-III 9 domain)                                       | Matricellular      | Glycoprotein   | 272511 | FN1*      | 1.258  | 0.340 | 3.173  | 0.042 | 2.522   | 0.069 | 15%              |
| Fibronectin 1(type-III 7 domain)                                       | Matricellular      | Glycoprotein   | 272511 | FN1*      | 0.980  | 0.913 | 2.790  | 0.029 | 2.847   | 0.031 | 17%              |
| Fibronectin 1(Anastellin/type-III 1 domain)                            | Matricellular      | Glycoprotein   | 272511 | FN1*      | 0.703  | 0.135 | 2.520  | 0.050 | 3.585   | 0.032 | 22%              |
| Fibronectin 1(type-III 13 domain)                                      | Matricellular      | Glycoprotein   | 272511 | FN1*      | 1.006  | 0.986 | 2.474  | 0.112 | 2.459   | 0.130 | 20%              |
| Lumican                                                                | Matricellular      | Proteoglycan   | 38279  | LUM       | 1.092  | 0.106 | 0.983  | 0.888 | 0.900   | 0.393 | 9%               |
| Periostin                                                              | Matricellular      | Proteoglycan   | 93155  | POSTN     | 0.831  | 0.086 | 1.300  | 0.369 | 1.563   | 0.191 | 15%              |
| Prolargin                                                              | Matricellular      | Proteoglycan   | 43179  | PRELP     | 1.070  | 0.710 | 1.050  | 0.786 | 0.981   | 0.891 | 16%              |
| Secreted protein, acidic, cysteine-rich (osteonectin)                  | Matricellular      | Proteoglycan   | 34296  | SPARC     | 1.280  | 0.513 | 1.366  | 0.109 | 1.068   | 0.827 | 15%              |
| Osteopontin                                                            | Matricellular      | Glycoprotein   | 34963  | SPP1      | 0.794  | 0.360 | 1.193  | 0.451 | 1.503   | 0.174 | 14%              |
| Thrombospondin 1                                                       | Matricellular      | Glycoprotein   | 129647 | THBS1     | 1.001  | 0.996 | 3.909  | 0.022 | 3.905   | 0.021 | 26%              |
| tenascin C(iso1,2,3,4,5)                                               | Matricellular      | Glycoprotein   | 221756 | TNC*      | 1.052  | 0.927 | 4.324  | 0.033 | 4.112   | 0.036 | 14%              |
| Versican                                                               | Matricellular      | Proteoglycans  | 300008 | VCAN      | 0.992  | 0.945 | 1.500  | 0.084 | 1.512   | 0.083 | 13%              |
| Alpha/gamma-enolase                                                    | Other Cellular     | Cellular       | 47128  | ENO1/2    | 1.062  | 0.558 | 1.616  | 0.393 | 1.521   | 0.443 | 23%              |
| Glyceraldehyde-3-phosphate dehydrogenase                               | Other Cellular     | Cellular       | 35828  | GAPDH     | 1.065  | 0.662 | 1.171  | 0.652 | 1.100   | 0.782 | 11%              |
| Histone H1(H1.1,H1.2,H1.3,H1.4)                                        | Other Cellular     | Cellular       | 20863  | H1*       | 1.178  | 0.433 | 0.780  | 0.133 | 0.662   | 0.080 | 9%               |
| Histone 2A(H2A-A-K)                                                    | Other Cellular     | Cellular       | 14077  | H2A*      | 1.193  | 0.422 | 0.899  | 0.535 | 0.753   | 0.250 | 28%              |
| Annexin A2                                                             | Other ECM          | ECM-affiliated | 38678  | ANXA2     | 1.255  | 0.233 | 1.045  | 0.800 | 0.833   | 0.134 | 11%              |
| Annexin A4                                                             | Other ECM          | ECM-affiliated | 35849  | ANXA4     | 0.997  | 0.988 | 0.499  | 0.046 | 0.501   | 0.035 | 32%              |
| Asporin                                                                | Other ECM          | Proteoglycan   | 42573  | ASP       | 0.856  | 0.636 | 0.357  | 0.102 | 0.417   | 0.030 | 38%              |
| Galectin-3                                                             | Other ECM          | ECM-affiliated | 27202  | LGALS3    | 1.165  | 0.777 | 2.474  | 0.066 | 2.124   | 0.157 | 88%              |
| Mimectan/Osteoglycin                                                   | Other ECM          | Proteoglycan   | 34069  | OGN       | 1.068  | 0.423 | 0.722  | 0.059 | 0.676   | 0.048 | 13%              |
| Bone Marrow Proteoglycan(BMP & Eosinophil granule major basic protein) | Other ECM          | Proteoglycan   | 25129  | PRG2*     | 1.222  | 0.654 | 1.095  | 0.666 | 0.896   | 0.783 | 25%              |
| Albumin                                                                | Secreted           | Secreted       | 68731  | ALB       | 0.945  | 0.671 | 1.093  | 0.604 | 1.156   | 0.442 | 13%              |
| Transforming growth factor-beta-induced protein ig-h3                  | Secreted           | Glycoprotein   | 74597  | TGFB      | KC     | ND    | 0.584  | 0.017 | TC      | ND    | 24%              |
| Biglycan                                                               | Structural ECM     | Proteoglycan   | 41706  | BGN       | 1.175  | 0.285 | 1.682  | 0.021 | 1.431   | 0.079 | 10%              |
| Decorin                                                                | Structural ECM     | Proteoglycan   | 39805  | DCN       | 1.345  | 0.007 | 0.764  | 0.017 | 0.568   | 0.000 | 19%              |
| Fibrillin 1                                                            | Structural ECM     | Glycoprotein   | 311952 | FBN1      | 0.976  | 0.898 | 1.237  | 0.277 | 1.268   | 0.311 | 14%              |
| Fibrillin 2                                                            | Structural ECM     | Glycoprotein   | 313818 | FBN2      | 1.059  | 0.694 | 1.129  | 0.778 | 1.066   | 0.881 | 21%              |
| Fibromodulin                                                           | Structural ECM     | Proteoglycan   | 43219  | FMOD      | 0.813  | 0.500 | 1.601  | 0.008 | 1.970   | 0.036 | 21%              |
| Latent transforming growth factor beta binding protein 1               | Structural ECM     | Glycoprotein   | 186599 | LTBP1     | 0.897  | 0.647 | 1.917  | 0.138 | 2.137   | 0.127 | ND               |
| Microfibrillar-associated protein 2                                    | Structural ECM     | Glycoprotein   | 20578  | MFAP2     | 1.024  | 0.822 | 1.033  | 0.791 | 1.009   | 0.950 | 13%              |

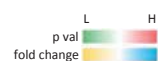

## Supplementary Figure Legends

### Supplementary Fig 1.

(a) Kaplan-Meier of overall survival of PDAC patients from GSE21501 with patients divided into those with high and low collagen expression by normalized microarray analysis of collagen gene expression, log rank  $p = 0.04$ ,  $n = 67$ . (b) Bar graphs quantifying the Masson's Trichrome stained PDAC tissue arrays from patients with well ( $n = 19$ ), moderately ( $n = 23$ ) or poorly differentiated ( $n = 26$ ) tumors. (c) Bar graphs quantifying the PR stained pancreatic tissue described in (b) within the main stroma. (d) Bar graphs quantifying the Masson's Trichrome stained PDAC tissue from PDAC patients cohort representing patients with a median short survival of 11–289 days ( $n=29$ ) and median long survival of 1090–3298 days ( $n = 28$ ). (e) Bar graphs quantifying the PR stained pancreatic tissue described in d within the main stroma. (f) Photomicrographs of Masson's Trichrome (top panel) stained PDAC tissue from PDAC patients cohort representing patients with wild type SMAD4 ( $n = 10$ ) and mutant SMAD4 ( $n = 10$ ). Scale bar, 100  $\mu\text{m}$ . Immunofluorescence images and quantifications of pancreatic tissue as described above stained for  $\alpha\text{SMA}$  (red, 2<sup>nd</sup> panel), and DAPI (blue). Scale bar, 75  $\mu\text{m}$ . Results are presented as the mean  $\pm$  SEM. Subsequent statistical analysis was performed with unpaired two-sided student t-tests. (\* $P < 0.05$ ; \*\* $P < 0.01$ , \*\*\* $P < 0.001$ , \*\*\*\* $P < 0.0001$ , “ns” not significant).

### Supplementary Fig 2.

(a) Immunofluorescence images and quantifications of pancreatic tissues stained for Collagen 3 (green, 1<sup>st</sup> panel), FAP (green, 2<sup>nd</sup> panel), Gli1 (green, 3<sup>rd</sup> panel),  $\alpha\text{SMA}$  (green, 4<sup>th</sup> panel) and DAPI (blue) from 20 weeks old tissue excised from mice expressing Kras with one mutant allele of *Tp53* (KPC) and Kras with heterozygous loss of the *Tgfr2* in the pancreatic epithelium (KTC). Scale bar, 75  $\mu\text{m}$ . For *in vivo* experiments,  $n = 5$  mice per group. Subsequent statistical analysis was performed with unpaired two-sided student t-tests. (\* $P < 0.05$ ; \*\* $P < 0.01$ , \*\*\* $P < 0.001$ , \*\*\*\* $P < 0.0001$ , “ns” not significant).

### Supplementary Fig 3.

(a) Bar graphs quantifying the tissue images shown in the pancreatic tissue from 20 weeks old pancreatic tissue excised from mice expressing Kras (KC), Kras with one mutant allele of P53 (KPC) or Kras with heterozygous loss of *Tgfr2* in the pancreatic epithelium (KTC) shown in the



panels in figure (2a). **(b)** Bar graphs quantifying the matrix protein concentration of Tenascin C, Fibronectin 1 and collagen, type XII, alpha1 in KC and KTC tissues described above as measured by mass spectrometry. **(c)** Traction force maps measured on polyacrylamide gels (2,300 Pa) for isolated KC, KPC and KTC pancreatic epithelial tumor cells. For *in vitro* bar graphs, results are the mean +/- SEM of 3 independent experiments. For *in vivo* experiments,  $n = 5$  mice per group. Subsequent statistical analysis was performed with unpaired two-sided student t-tests. (\* $P < 0.05$ ; \*\* $P < 0.01$ , \*\*\* $P < 0.001$ , \*\*\*\* $P < 0.0001$ , “ns” not significant).

#### **Supplementary Fig 4.**

**(a)** Images of three dimensional collagen gels incubated with KC, KPC or with KTC pancreatic epithelial tumor cells treated with vehicle or the ROCK inhibitor Y27632. Cultures were assayed after 24 h (top panel). Polarized light images of color-coded PR stained collagen gels described above (bottom panel) and bar graphs quantifying three dimensional collagen gel contraction as indicated by collagen gel area shown in a. **(b)** Immunoblot and quantification showing Rock1 protein levels in KTC tumor cells expressing either a control shRNA or an shRNA to Rock1. Results are normalized to Gapdh. **(c)** Bar graphs quantifying the tissue images shown in the panels in figure (2e). **(d)** Bioluminescence images of tumor growth in nude mice 3 weeks after injection with KC, KPC, KTC and KTC pancreatic tumor cells expressing either a control shRNA or an shRNA to ROCK1. **(e)** Bar graph showing the weight of the pancreatic tumors generated by the KC, KPC and KTC pancreatic epithelial cancer cells. **(f)** Bar graphs quantifying CTGF mRNA expression for pancreatic tumors described in d. Results are normalized to  $\beta$ -actin. **(g)** Phase-contrast images of tumor colonies of KC, KPC, and KTC pancreatic tumor cells expressing either a control shRNA or an shRNA to ROCK1 embedded within soft agar. Scale bar, 40  $\mu\text{m}$  and bar graph quantifying percentage of tumor colonies greater than 30  $\mu\text{m}$  in diameter. For *in vitro* bar graphs, 3 technical replicates were performed and results are the mean +/- SEM of 3 independent experiments. For *in vivo* experiments,  $n = 5$  mice per group. Subsequent statistical analysis was performed with either unpaired two-sided student t-tests, one-way ANOVA with Tukey’s method for multiple comparisons. (\* $P < 0.05$ ; \*\* $P < 0.01$ , \*\*\* $P < 0.001$ , \*\*\*\* $P < 0.0001$ , “ns” not significant).

#### **Supplementary Fig 5.**

**(a)** Images of collagen gels (top panel) and polarized light color-coded PR stained collagen gels (2<sup>nd</sup> panel) incubated with KC or KPC pancreatic epithelial tumor cells treated with vehicle or

the Rock inhibitor Y27632 with accompanying quantifications. **(b)** Immunoblot and quantification showing Rock2 protein levels in KTC tumor cells expressing either a control shRNA or an shRNA to Rock2. Results are normalized to Gapdh. **(c)** Images of collagen gels incubated with KTC pancreatic tumor cells expressing either a control shRNA or an shRNA to Rock2 and quantifications. **(d)** Immunofluorescence images and quantifications of pancreatic epithelial tumor cells described in c stained for pMlc2 (red, top panel), pMyPT1 (red, 2<sup>nd</sup> panel) and DAPI (blue). Scale bar, 75  $\mu$ m. For *in vitro* bar graphs, 3 technical replicates were performed and results are the mean  $\pm$  SEM of 3 independent experiments. Subsequent statistical analysis was performed with either unpaired two-sided student t-tests, one-way ANOVA with Tukey's method for multiple comparisons. (\* $P < 0.05$ ; \*\* $P < 0.01$ , \*\*\* $P < 0.001$ , \*\*\*\* $P < 0.0001$ , "ns" not significant).

### Supplementary Fig 6.

**(a)** Immunofluorescence images and quantifications of pancreatic tissue excised from 8 week old KC, KPC and KTC mice stained for pStat3 (red) and DAPI (blue). Scale bar, 50 $\mu$ m. **(b)** Representative images of three-dimensional collagen gels incubated with KTC pancreatic epithelial tumor cells for 24 hours either with vehicle or the JAK inhibitor Ruxolitinib. **(c)** Images of three-dimensional collagen gels incubated with KC tumor cells treated with vehicle or the conditioned media from 48 hour cultured KTC tumor cells treated with vehicle or with JAK inhibitor Ruxolitinib. **(d)** Immunoblot and quantification showing total (Stat3) and activated Stat3 (pStat3) levels in KTC tumor cells cultured on soft or stiff polyacrylamide substrates. **(e)** Cytokines array images measured in the conditioned media of KC and KTC cells cultured on soft or stiff polyacrylamide substrates. **(f)** Cartoon depicting the epithelial Jak-Rock-Stat3-Yap feed forward circuit and its potentiation by a stiff extracellular matrix microenvironment. For *in vitro* bar graphs, 3 technical replicates were performed and results are the mean  $\pm$  SEM of 3 independent experiments. For *in vivo* experiments,  $n = 5$  mice per group. Subsequent statistical analysis was performed with either unpaired two-sided student t-tests, one-way ANOVA with Tukey's method for multiple comparisons. (\* $P < 0.05$ ; \*\* $P < 0.01$ , \*\*\* $P < 0.001$ , \*\*\*\* $P < 0.0001$ , "ns" not significant).

### Supplementary Fig 7.

**(a)** Graphic of mouse manipulations used to study the impact of  $\beta$ 1-V737N expression in the pancreatic epithelium on tissue fibrosis. **(b)** Immunofluorescence images and quantifications of

pancreatic tissues excised from 3 month old control and  $\beta 1$ -V737N mice stained for  $p^{397}$ -Ptk2 (red, top panel) and p-MLC2 (red, 2<sup>nd</sup> panel), p-Stat3 (red, 5<sup>th</sup> panel), scale bar, 50  $\mu$ m, CD45 (red, 6<sup>th</sup> panel) and CD68 (red, 7<sup>th</sup> panel), scale bar, 100  $\mu$ m, and DAPI (blue). **(b)** (3<sup>rd</sup> panel) Polarized light images of collagen fibers revealed by picosirius red (PR) staining of pancreatic tissue described above. Scale bar, 75  $\mu$ m. **(b)** (4<sup>th</sup> panel) Representative force maps of ECM stiffness measured using AFM indentation in pancreatic tissue described above. **(c)** Bar graphs quantifying *Ctgf* mRNA expression for pancreatic tissue shown in (b). Results are normalized to  $\beta$ -actin. **(d)** Bar graphs showing quantification of total pancreatic CD45+ and Ly6C immune cells as determined by flow cytometry for pancreatic tissue shown in (b). **(e)** Cytokines array images and quantification of measured in pancreatic tissue shown in b. For *in vitro* bar graphs, 3 technical replicates were performed and results are the mean +/- SEM of 3 independent experiments. For *in vivo* experiments,  $n = 5$  mice per group. Subsequent statistical analysis was performed with either unpaired two-sided student t-tests, one-way ANOVA with Tukey's method for multiple comparisons. (\* $P < 0.05$ ; \*\* $P < 0.01$ , \*\*\* $P < 0.001$ , \*\*\*\* $P < 0.0001$ , "ns" not significant).

### Supplementary Fig 8.

**(a)** Immunofluorescence images and quantifications of 6 week old pancreatic tissue excised from  $\beta 1$ -V737N mice treated with vehicle or the FAK inhibitor PND-1186 stained for  $p^{397}$ -Ptk2 (red, top panel), p-MLC2 (red, 2<sup>nd</sup> panel), p-Stat3 (red, 5<sup>th</sup> panel), scale bar, 50  $\mu$ m, CD45 (red, 6<sup>th</sup> panel), CD68 (red, 7<sup>th</sup> panel), scale bar, 100  $\mu$ m, and DAPI (blue). (3<sup>rd</sup> panel) Polarized light images and quantification of collagen fibers revealed by PR staining of pancreatic tissue described above. Scale bar, 75  $\mu$ m. (4<sup>th</sup> panel) Maps of ECM stiffness and quantifications measured using AFM indentation in pancreatic tissue described above. For *in vivo* experiments,  $n = 5$  mice per group. Subsequent statistical analysis was performed with either unpaired two-sided student t-tests, one-way ANOVA with Tukey's method for multiple comparisons. (\* $P < 0.05$ ; \*\* $P < 0.01$ , \*\*\* $P < 0.001$ , \*\*\*\* $P < 0.0001$ , "ns" not significant).

### Supplementary Fig 9.

**(a)** Immunoblot showing FAK level in KTC tumor cells expressing either a control shRNA or an shRNA to Ptk2. Results are normalized to Gapdh. **(a')** Bar graph showing the quantification of a. **(b)** Representative bioluminescence images of tumor growth in nude mice 3 weeks after injection with KTC pancreatic tumor cells expressing either a control shRNA or an shRNA to

Ptk2. (c) Bar graphs showing KC and KC/ $\beta$ 1-V737N mice body weight at study termination. (d) Bar graphs showing quantification of total pancreatic Ly6C and CD11b immune cells as determined by flow cytometry measured in KC and KC/ $\beta$ 1-V737N pancreatic tissue. (e) Cytokines array images and quantifications measured in KC and KC/ $\beta$ 1-V737N pancreatic tissue. For *in vitro* bar graphs, 3 technical replicates were performed and results are the mean  $\pm$  SEM of 3 independent experiments. For *in vivo* experiments,  $n = 5$  mice per group. Subsequent statistical analysis was performed with either unpaired two-sided student t-tests, one-way ANOVA with Tukey's method for multiple comparisons. (\* $P < 0.05$ ; \*\* $P < 0.01$ , \*\*\* $P < 0.001$ , \*\*\*\* $P < 0.0001$ , "ns" not significant).

### Supplementary Fig 10.

(a,b) Polarized light images of collagen fibers revealed by PR staining of pancreatic tissues excised from 5 week old control, KC and homozygous KTC (KTC KO) mice (Top panel). Scale bar, 75  $\mu$ m. Representative immunofluorescence images and quantifications of pancreatic tissues described above stained for p-MLC2 (red, 2<sup>nd</sup> panel), <sup>p397</sup>-Ptk2 (red, 3<sup>rd</sup> panel), YAP (red, 4<sup>th</sup> panel), p-Stat3 (red, 5<sup>th</sup> panel) and DAPI (blue). Scale bar 20  $\mu$ m. (c) Quantification of ECM stiffness measured by AFM in pancreatic tissue shown in a. For *in vivo* experiments,  $n = 5$  mice per group. Subsequent statistical analysis was performed with either unpaired two-sided student t-tests, one-way ANOVA with Tukey's method for multiple comparisons. (\* $P < 0.05$ ; \*\* $P < 0.01$ , \*\*\* $P < 0.001$ , \*\*\*\* $P < 0.0001$ , "ns" not significant).

### Supplementary Fig 11.

(a) Immunofluorescence images and quantifications of pancreatic tissues excised from 5 week old control and Stat3C mice stained for pStat3 (red, top panel), scale bar, 75  $\mu$ m, <sup>p397</sup>-Ptk2 (red, 2<sup>nd</sup> panel) and pMlc2 (red, 3<sup>rd</sup> panel), scale bar, 50  $\mu$ m, CD45 (red, 5<sup>th</sup> panel), CD68 (red, 6<sup>th</sup> panel), scale bar, 100  $\mu$ m and DAPI (blue). Polarized light images of collagen fibers revealed by PR staining of pancreatic tissue described above (4<sup>th</sup> panel). Scale bar, 75  $\mu$ m. Phase contrast images of H&E stained pancreatic tissue as described above (7<sup>th</sup> panel). Scale bar, 100  $\mu$ m. (b) Bar graphs quantifying *Ctgf* mRNA expression for pancreatic tissue excised from 5 week old homozygous KTC (KTC KO) (Control) and KTC/Stat3 KO mice (Stat3 KO). Results are normalized to  $\beta$ -actin. (c) Immunofluorescence confocal images and quantifications of pancreatic tissues from 6 week old KTC (het) mice treated with either vehicle or the JAK inhibitor Ruxolitinib stained for pStat3 (red, top panel), scale bar, 75  $\mu$ m, <sup>p397</sup>-Ptk2 (red, 2<sup>nd</sup> panel) and



pMlc2 (red, 3<sup>rd</sup> panel), scale bar, 50  $\mu\text{m}$ , CD45 (red, 5<sup>th</sup> panel), CD68 (red, 6<sup>th</sup> panel), scale bar, 100  $\mu\text{m}$ , and DAPI (blue). Polarized light images and quantifications of collagen fibers revealed by PR staining of pancreatic tissue described above (4<sup>th</sup> panel). Scale bar, 75  $\mu\text{m}$ . Phase contrast images of H&E stained pancreatic tissue as described above (7<sup>th</sup> panel). Scale bar, 100  $\mu\text{m}$ . **(d)** Quantification of ECM stiffness measured by AFM in pancreatic tissue shown in c. **(e)** Bar graphs quantifying the weight of the pancreatic tumors shown in c. For *in vivo* experiments,  $n = 5$  mice per group. Subsequent statistical analysis was performed with either unpaired two-sided student t-tests, one-way ANOVA with Tukey's method for multiple comparisons. ( $*P < 0.05$ ;  $**P < 0.01$ ,  $***P < 0.001$ ,  $****P < 0.0001$ , "ns" not significant).

### **Supplementary Fig 12.**

**(a)** Immunofluorescence images and quantifications of pancreatic tissue from PDAC patients cohort representing patients with a median short survival of 11–289 days ( $n = 29$ ) and median long survival of 1090–3298 days ( $n = 28$ ) stained for Sox2 (red, top panel), Vimentin (red, 2<sup>nd</sup> panel) and DAPI (blue). Scale bar, 75  $\mu\text{m}$ . **(b)** Immunofluorescence images and quantifications of pancreatic tissue from PDAC patients cohort representing patients with WT SMAD4 ( $n = 10$ ) and mutant SMAD4 ( $n = 10$ ) stained for Sox2 (red, top panel), Vimentin (red, 2<sup>nd</sup> panel) and DAPI (blue). Scale bar, 75  $\mu\text{m}$ . Subsequent statistical analysis was performed with either unpaired two-sided student t-tests, one-way ANOVA with Tukey's method for multiple comparisons. ( $*P < 0.05$ ;  $**P < 0.01$ ,  $***P < 0.001$ ,  $****P < 0.0001$ , "ns" not significant).

### **Supplementary Table 1.**

List of genes used for gene expression analysis of human patient dataset GSE21501 presented in Supplementary Figure 1a.

### **Supplementary Table 2.**

Complete Mass spectrometry results from whole tissue analysis of ECM composition of KC, KPC, and KTC tumors (5 mice per group). Values are presented as a ratio of protein abundance between each of the groups as well as a statistical analysis of abundance differences.
